# Supplementary material for: ETS Transcription Factors Control Transcription of EZH2 and Epigenetic Silencing of the Tumor Suppressor Gene Nkx3.1 in Prostate Cancer
Source: PLoS One. 2010 May 10;5(5):e10547. doi: 10.1371/journal.pone.0010547 (PMC2866657; doi:10.1371/journal.pone.0010547)
Supplement: TableS2 — Genes selectively modulated in ERGhigh and ESE3low tumors. (0.08 MB XLS) [file pone.0010547.s002.xls]

## Sheet: ERG ESE3 vs NoETS
		ERG ESE3 vs NoETS
UPREGULATED GENES				DOWNREGULATED GENES
A2M					AAMP
ACSL5					ABAT
AF103531					ABCC1
AF490941					ABCE1
AHSA2					ABHD3
AMPD1					ABP1
APBA3					ACAD8
APOBEC3B					ACADL
APOC4					ACADM
APOL3					ACAT2
ARHGDIB					ACCN5
ARMC3					ACPP
ASB5					ACSL1
ASB9					ACSL4
AVPI1					ADAM9
A_23_P10656					ADCY2
A_23_P207881					ADI1
A_23_P256923					AFG3L2
A_23_P32661					AGGF1
A_23_P366468					AHSA1
A_23_P435390					AK057704
A_23_P44053					AK127548
A_23_P84695					AKAP10
A_23_P94779					ALDH3A2
A_23_P9854					ALDH6A1
B3GNT5					ALDH7A1
BATF					ALLW1950
BCL3					ALOX15B
BIRC3					ANG
BIRC5					ANGEL2
BRDG1					ANGPTL7
BRDT					ANKH
BTBD7					ANKRD18B
BXDC1					ANKRD22
C12orf37					ANP32C
C12orf46					ANPEP
C14orf151					AP1B1
C17orf44					APOBEC3C
C19orf28					AQP11
C1QTNF4					AQP3
C1R					AR
C20orf102					ARF4
C3					ARFGAP3
C4orf15					ARG2
C4orf18					ARHGAP6
C6orf125					ARHGEF12
C8orf38					ARID4B
C9orf58					ARL17P1
CA8					ARL5A
CADPS					ARL6IP6
CALML5					ARMC1
CAMP					ARPC1A
CAPN10					ARSJ
CAPN2					ASAH1
CASKIN2					ASB8
CASP2					ASRGL1
CBR3					ASTN2
CCDC50					ATM
CCDC88					ATP2C2
CCL19					ATP5B
CCL2					ATP5C1
CCR7					ATP6AP2
CD2					ATP6V0E1
CD247					ATP6V1A2
CD28					ATP6V1D
CDC42BPB					ATP6V1G1
CENTA2					AUH
CFI					AXIN2
CHRDL2					A_23_P113196
CHRNA4					A_23_P115902
CITED2					A_23_P120644
CLDN4					A_23_P136020
CLEC12A					A_23_P142113
CMTM3					A_23_P149595
COL10A1					A_23_P158513
COL1A1					A_23_P165819
COX6A2					A_23_P169587
CPA5					A_23_P200955
CPXM2					A_23_P203089
CSAG3A					A_23_P215856
CSF1R					A_23_P26044
CSRP3					A_23_P376449
CST6					A_23_P47546
CX3CL1					A_23_P63441
CXCL10					A_23_P64184
CXorf50					A_23_P78318
DDX58					A_23_P95045
DEFB119					A_23_P95311
DMBT1					B2M
DYRK3					B3GAT2
DZIP1L					BAIAP2L1
EDN1					BANK1
ENST00000333066					BARD1
ENST00000359711					BASP1
EPOR					BAT2D1
EZH2					BBX
F2					BCAP29
F7					BCCIP
FAP					BCL11A
FCGR3A					BEX2
FGF13					BGN
FLJ43339					BIVM
FLJ44379					BMI1
FRZB					BNIP3
GBP5					BP75
GIPC2					BRD2
GLRB					BRIP1
GNL2					BRWD2
GP1BB					BTAF1
GPR110					BTG1
GPSM1					BUB3
GUSB					BZW1
GZMK					C10orf104
HAPLN3					C10orf28
HCFC1R1					C10orf57
HDCGC21P					C10orf58
HIST1H2AI					C11orf52
HLA-C					C11orf58
HLA-DPB1					C13orf27
HNF4A					C14orf138
HRH1					C14orf43
HS322B1A					C19orf2
HS6ST2					C1orf103
HSD17B11					C1orf115
IFNG					C1orf116
IGF2					C1orf149
IGKV					C20orf133
IGLL1					C20orf42
IGLV3-21					C21orf100
IGLV3-25					C21orf51
IL17C					C3orf14
IL1RN					C4orf33
IL20RB					C4orf34
IL27					C6orf61
IL4I1					C7orf13
IL6					C8orf40
INDO					C9orf125
INHBA					C9orf77
IPO11					C9orf78
IRF2BP2					CA12
IRF5					CALML3
ISG20					CALR3
ITGAX					CALU
JMJD5					CANX
JOSD3					CAP1
KCNK1					CARTPT
KCNK10					CAT
KIAA0125					CAV2
KIAA0922					CBFA2T2
KRT17					CBWD2
KRT4					CCDC112
LAD1					CCDC117
LAIR2					CCDC132
LBR					CCDC68
LCN2					CCK
LCP2					CCNE2
LIMK1					CCNG2
LOC203547					CD164
LOC283588					CD177
LOC283874					CD38
LOC389833					CD47
LPXN					CD9
LRP4					CDADC1
LRP8					CDC16
LSP1					CDC42EP5
LY96					CDH1
MAN2A2					CDH17
MAP2					CDH19
MATK					CDK2AP1
MEI1					CDKL5
MELK					CEP110
MGC20983					CES2
MICAL2					CHAC2
MID1IP1					CHES1
MIP					CHMP5
MMP10					CHPT1
MMP19					CHST9
MOXD1					CIRBP
MRAS					CKB
MST150					CLGN
MTHFD2					CLINT1
MUC1					CLMN
MUM1L1					CMAS
MYLC2PL					CMBL
NAIP					CMTM6
NCAPG					CMTM8
NCR1					CNBP
NEIL3					CNN3
NFE2L3					COBRA1
NFKBIA					COL9A1
NHLH2					COMMD4
NOX4					COX7A2L
PALM					CPAMD8
PAPLN					CPE
PARG					CPEB3
PBX4					CPNE4
PCDHB10					CREB1
PDGFRB					CREG1
PDZK1IP1					CRK
PEX6					CRLS1
PIM2					CRSP3
PKHD1					CRYM
PLA1A					CRYZ
PLAT					CST3
PLXND1					CSTA
PNRC1					CTBP2
PPA1					CTBS
PREX1					CTDSP2
PRSS22					CTNNBL1
PSD3					CXorf26
PTPRC					CYB561
PTPRK					CYB5B
PTRF					CYCS
RAD54B					CYP20A1
RASSF2					DAAM1
RCC1					DBI
RCN3					DC2
RERE					DCAKD
RFXDC1					DCTN4
RGS10					DDX42
RHBDF2					DEGS1
RKHD3					DENR
ROR1					DERL1
RPL22L1					DHCR24
RUNX3					DHRS7
S100A8					DHRS7C
S100A9					DHX15
SALF					DIP13B
SAPS1					DKFZP564O0523
SCGB1A1					DKFZP686A01247
SCUBE1					DKFZp564K142
SDK1					DKFZp566H0824
SFXN4					DMKN
SIN3B					DMXL1
SIPA1L2					DNAJB6
SLC39A2					DNER
SLC43A1					DOCK1
SLN					DPYD
SLPI					DPYS
SMOC2					DR1
SNCB					DSCR1L2
SPAG5					DSG2
SPATA19					DSP
SPINK1					DUSP11
SRC					DUSP3
TAP1					EAF1
TFE3					EBP
TGFBI					EDG6
THBS2					EIF3S10
THC2245026					EIF3S6
THC2337941					EIF4A2
THC2339388					EIF4G2
THC2374066					ELOF1
THC2410866					ELOVL5
THC2432688					ENDOD1
TMF1					ENPP5
TMPRSS4					ENSA
TMSB10					ENST00000360178
TNFAIP2					ENST00000370611
TNFRSF21					EPSTI1
TNS1					ESRRG
TRAF3IP3					EXPH5
TRBV5-4					FABP4
TSSK1					FAM129A
TXLNB					FAM18B
UBE2E3					FAM44C
UCN					FAM45B
UGCGL1					FAM55A
UGT2B4					FAM55D
UHRF1					FAM82B
URP2					FAM84A
VASN					FANCC
VIPR1					FBXL11
WNK2					FBXL3
WNT2					FBXL5
XAGE1					FDFT1
ZFAND5					FES
					FLJ10154
					FLJ11996
					FLJ12993
					FLJ20035
					FLJ20273
					FLJ20628
					FLJ20700
					FLJ30317
					FLJ31568
					FLJ31659
					FLJ35834
					FLJ38482
					FMR1
					FNDC4
					FOSL1
					FOXO3A
					FTS
					FUNDC2
					FUT3
					FXYD3
					FYTTD1
					FZD10
					G3BP2
					GABARAP
					GABARAPL1
					GABRG1
					GABRG3
					GALNT12
					GAS1
					GAST
					GCLC
					GCNT2
					GDEP
					GDPD2
					GEMIN5
					GGH
					GJE1
					GLCE
					GLO1
					GLRX2
					GLUD2
					GMPR
					GNA11
					GNAQ
					GNB1
					GNG4
					GNMT
					GNPTAB
					GOLGA4
					GPIAP1
					GPR56
					GPR83
					GREB1
					GSPT1
					GSTA2
					GSTA3
					GSTA4
					GSTT1
					GSTT2
					GYG1
					H3F3B
					HBP1
					HIAT1
					HIATL1
					HIF1A
					HIGD1A
					HIST1H2AA
					HIST1H2AC
					HIST1H2AL
					HIST1H3A
					HIST1H3C
					HIST1H3G
					HIST2H2BE
					HIST2H4B
					HMGB1
					HMGCS1
					HMGN1
					HNMT
					HNRPA2B1
					HNRPAB
					HNRPR
					HOXB8
					HOXD1
					HSDL1
					HSP90AA1
					HSP90B1
					HSPA8
					HSPC159
					HUWE1
					HYLS1
					IDH1
					IER3IP1
					IFT57
					IFT81
					IGF2R
					IGL@
					IGSF4D
					IL28RA
					IL9
					INE1
					INSIG1
					INTS2
					IPP
					IQCA
					IRS1
					ITGB1
					ITLN1
					ITM2B
					KAL1
					KARS
					KAT3
					KBTBD11
					KBTBD7
					KCTD14
					KCTD20
					KCTD8
					KIAA0738
					KL
					KLHL2
					KLK11
					KLK2
					KLK3
					KLK4
					KLK6
					KRAS
					KRT13
					KRT15
					KRT2
					KRT26
					LAMP2
					LARP1
					LDLR
					LEPREL1
					LEPROT
					LGMN
					LIMA1
					LMO4
					LOC124220
					LOC125893
					LOC144983
					LOC147804
					LOC153222
					LOC202459
					LOC388335
					LOC399761
					LOC441294
					LOC552891
					LOC81691
					LONRF1
					LRP11
					LRP12
					LRRC39
					LSAMP
					MAD2L1
					MAFB
					MAGEH1
					MANSC1
					MAP2K1IP1
					MAPK9
					MAPKAP1
					MARS2
					MARVELD3
					MATR3
					MCM3APAS
					MED6
					MEIS1
					MESP1
					METTL7A
					MGC40405
					MGST1
					MGST3
					MME
					MOAP1
					MOCS2
					MON1B
					MORF4L1
					MPPED2
					MRFAP1L1
					MRPL1
					MRPL3
					MRPS23
					MT1H
					MT1X
					MTMR9
					MTRF1L
					MYEOV2
					MYLIP
					MYST3
					NADK
					NAG8
					NAGK
					NANS
					NARG1L
					NAT13
					NCKAP1
					NDRG1
					NDUFS2
					NECAP1
					NELL1
					NEU1
					NHN1
					NIPA1
					NKX3-1
					NNT
					NONO
					NOV
					NPTN
					NR0B1
					NR2E3
					NR3C1
					NRXN3
					NT5C2
					NUDT15
					NUDT4
					NUPL2
					OAZ3
					OCIAD1
					OSBP
					P2RY5
					PAIP2
					PAQR3
					PARL
					PB1
					PCBP2
					PCDH7
					PCMT1
					PCTK2
					PDCD7
					PDE6D
					PDIA6
					PEBP4
					PEG10
					PEX3
					PFN2
					PGAM1
					PGM3
					PHF5A
					PHLDA2
					PI4K2B
					PICALM
					PIGH
					PIK3CB
					PLCXD3
					PLD5
					PLP1
					PLS3
					PNRC2
					PODN
					POF1B
					POFUT2
					PPARA
					PPIL4
					PPM1K
					PPP1CA
					PPP1CB
					PPP1R7
					PPP2CB
					PPP2R5C
					PQLC3
					PRDX1
					PRDX3
					PRKAG1
					PRO0245
					PRO0457
					PRO0483
					PRO1843
					PRPS2
					PSAT1
					PSMB2
					PSMD10
					PSMD11
					PTMA
					PTP4A2
					PTPN11
					PTPN9
					PTPRO
					RAB18
					RAB1A
					RAB2
					RAB28
					RAB31
					RAC1
					RALB
					RANBP9
					RAP1A
					RASAL2
					RASSF6
					RBBP6
					RBM7
					RBMX2
					RCBTB1
					RCN2
					RDH11
					RDX
					REV3L
					RFPL3
					RFXAP
					RGPD5
					RGS5
					RGS7
					RIOK3
					RLN2
					RNASE4
					RNF17
					RNF6
					RNPEP
					ROBO1
					RPIB9
					RRAGC
					RTN4
					RWDD2
					RYBP
					S100A10
					S100B
					SAPS3
					SAR1B
					SBDS
					SC5DL
					SCARB2
					SCEL
					SCGB1D1
					SCGB1D2
					SCGB2A1
					SCNN1A
					SCOC
					SCP2
					SDHD
					SEC23B
					SEC24D
					SEC61G
					SELT
					SEMA4G
					SEPHS2
					SEPP1
					SERP1
					SERPINB13
					SERPINI1
					SERTAD4
					SESN1
					SFRS14
					SFRS15
					SFRS2
					SFRS2B
					SFRS5
					SFT2D1
					SH3BGRL
					SHOC2
					SLC15A2
					SLC22A10
					SLC22A3
					SLC25A16
					SLC2A11
					SLC2A12
					SLC2A5
					SLC33A1
					SLC35A1
					SLC35A5
					SLC39A1
					SLC39A10
					SLC39A6
					SLC39A7
					SLC7A8
					SMAD4
					SMARCA2
					SMN2
					SMPD1
					SNAP25
					SNCA
					SNRPN
					SNTB2
					SNX17
					SNX25
					SNX3
					SOAT1
					SORBS2
					SORD
					SOX2
					SPAG1
					SPAG7
					SPATA2
					SPCS1
					SREBF2
					SRI
					SRP72
					SRP9
					SS18
					STARD3NL
					STAT1
					STAT3
					STEAP1
					STEAP2
					STOX2
					SULT2B1
					SUMO2
					SV2B
					SYAP1
					SYBL1
					SYF2
					SYNE2
					SYT17
					TAF11
					TAOK3
					TAX1BP1
					TBC1D9
					TBRG1
					TCEAL1
					TCF4
					TCF7L2
					THC2242233
					THC2308781
					THC2339568
					THRAP1
					THSD4
					TLE2
					TM9SF2
					TMBIM1
					TMCO1
					TMED10
					TMEM135
					TMEM16D
					TMEM59
					TMEM79
					TMEM87B
					TMPRSS2
					TMTC2
					TNFSF5IP1
					TNPO3
					TOMM70A
					TPM4
					TRAF3IP2
					TRAM1
					TRIM2
					TRIM23
					TRNT1
					TSC22D2
					TSHZ1
					TSP50
					TSPAN8
					TTC1
					TTTY11
					TUFM
					TUSC3
					TXNDC12
					U00943
					UNC50
					UNC5D
					UPF3B
					UPK3A
					USP13
					VAMP1
					VBP1
					VPS26A
					VPS29
					WDFY1
					WRB
					XAGE3
					XKR6
					XPNPEP1
					XPOT
					XRCC6
					YWHAQ
					YWHAZ
					YY1
					ZBED2
					ZCCHC17
					ZFAND6
					ZFP36L2
					ZHX1
					ZMYM6
					ZNF117
					ZNF137
					ZNF180
					ZNF181
					ZNF185
					ZNF395
					ZNF397
					ZNF426
					ZNF429
					ZNF43
					ZNF430
					ZNF486
					ZNF492
					ZNF493
					ZNF503
					ZNF512
					ZNF573
					ZNF578
					ZNF588
					ZNF600
					ZNF624
					ZNF649
					ZNF652
					ZNF654
					ZNF675
					ZNF678
					ZNF714
					ZNF791
					ZNF85

## Sheet: ERG ESE3 vs All
		ERG ESE3 vs All
UPREGULATED GENES			DOWNREGULATED GENES
ACSL5					ABCC1
AF103531					ABHD3
AF490941					ACAD8
AHSA2					ACADL
AMPD1					ACADM
APBA3					ACCN5
APOC4					ACSL1
APOL3					ACSL4
ASB5					ADAM9
A_23_P207881					AFG3L2
A_23_P32661					AGGF1
A_23_P435390					AHSA1
A_23_P44053					AK057704
A_23_P84695					AK127548
A_23_P94779					AKAP10
A_23_P9854					ALDH6A1
B3GNT5					ALDH7A1
BIRC3					ALLW1950
BIRC5					ANG
BRDG1					ANGEL2
BRDT					ANGPTL7
C14orf151					ANKH
C19orf28					ANKRD22
C1QTNF4					ANP32C
C1R					AQP11
C20orf102					AQP3
C4orf18					ARF4
C6orf125					ARG2
C8orf38					ARHGEF12
CA8					ARL17P1
CADPS					ARL6IP6
CALML5					ARMC1
CAPN10					ARPC1A
CAPN2					ARSJ
CASKIN2					ASAH1
CBR3					ATM
CCDC50					ATP2C2
CCL19					ATP5B
CCL2					ATP5C1
CD247					ATP6V0E1
CD28					ATP6V1G1
CDC42BPB					AUH
CFI					AXIN2
CHRDL2					A_23_P113196
CHRNA4					A_23_P115902
CITED2					A_23_P120644
CPA5					A_23_P136020
CPXM2					A_23_P142113
CSAG3A					A_23_P149595
CST6					A_23_P165819
CX3CL1					A_23_P169587
CXorf50					A_23_P200955
DDX58					A_23_P203089
DEFB119					A_23_P215856
DMBT1					A_23_P26044
DYRK3					A_23_P376449
DZIP1L					A_23_P63441
ENST00000359711					A_23_P64184
EZH2					A_23_P78318
F2					A_23_P95045
F7					A_23_P95311
FLJ43339					B2M
FLJ44379					B3GAT2
GIPC2					BAIAP2L1
GLRB					BANK1
GNL2					BARD1
GP1BB					BASP1
GPR110					BAT2D1
GZMK					BCAP29
HAPLN3					BCCIP
HCFC1R1					BEX2
HDCGC21P					BGN
HLA-C					BMI1
HNF4A					BP75
HRH1					BRD2
HS322B1A					BRWD2
HS6ST2					BTAF1
IGF2					BTG1
IGKV					BUB3
IGLL1					BZW1
IGLV3-21					C11orf52
IGLV3-25					C11orf58
IL20RB					C13orf27
IL27					C14orf138
IL4I1					C14orf43
INDO					C19orf2
INHBA					C1orf115
IRF5					C1orf149
KCNK1					C20orf42
KCNK10					C21orf100
KIAA0125					C21orf51
KRT17					C3orf14
LAIR2					C4orf34
LBR					C6orf61
LCN2					C7orf13
LIMK1					C8orf40
LOC283588					C9orf77
LOC283874					C9orf78
LOC389833					CA12
LPXN					CALR3
LRP4					CALU
LRP8					CBWD2
MAN2A2					CCDC112
MEI1					CCDC117
MICAL2					CCDC132
MID1IP1					CCDC68
MIP					CCNE2
MOXD1					CCNG2
MRAS					CD164
MUC1					CDADC1
MUM1L1					CDC16
MYLC2PL					CDH17
NCR1					CDH19
NEIL3					CDK2AP1
NOX4					CDKL5
PALM					CEP110
PAPLN					CHAC2
PARG					CHES1
PBX4					CHPT1
PCDHB10					CHST9
PDGFRB					CIRBP
PDZK1IP1					CLGN
PEX6					CLINT1
PIM2					CLMN
PKHD1					CMBL
PLAT					CMTM6
PLXND1					CNBP
PPA1					CNN3
PRSS22					COL9A1
PSD3					COMMD4
PTPRK					COX7A2L
PTRF					CPEB3
RAD54B					CREB1
RCN3					CREG1
RFXDC1					CRYM
RKHD3					CRYZ
ROR1					CTBP2
S100A8					CTDSP2
S100A9					CYB5B
SALF					CYCS
SAPS1					CYP20A1
SCGB1A1					DAAM1
SCUBE1					DC2
SLC39A2					DCAKD
SLC43A1					DCTN4
SMOC2					DEGS1
SNCB					DERL1
SPATA19					DHRS7C
SRC					DHX15
TAP1					DIP13B
TFE3					DKFZP564O0523
THC2245026					DKFZP686A01247
THC2337941					DKFZp566H0824
THC2374066					DMKN
THC2410866					DMXL1
THC2432688					DNAJB6
TNFAIP2					DOCK1
TNFRSF21					DPYD
TNS1					DR1
TRAF3IP3					DUSP11
TSSK1					EAF1
UGCGL1					EIF3S10
UGT2B4					EIF3S6
VASN					EIF4A2
VIPR1					EIF4G2
WNT2					ELOF1
XAGE1					ENDOD1
ZFAND5					ENPP5
					ENSA
					ENST00000360178
					ENST00000370611
					EPSTI1
					EXPH5
					FABP4
					FAM129A
					FAM18B
					FAM44C
					FAM45B
					FAM55A
					FAM55D
					FAM82B
					FAM84A
					FANCC
					FBXL11
					FBXL3
					FLJ10154
					FLJ11996
					FLJ12993
					FLJ20700
					FLJ30317
					FLJ31568
					FLJ35834
					FLJ38482
					FMR1
					FOSL1
					FOXO3A
					FUNDC2
					FUT3
					FXYD3
					FYTTD1
					FZD10
					G3BP2
					GABARAP
					GABARAPL1
					GABRG1
					GABRG3
					GALNT12
					GAS1
					GCLC
					GCNT2
					GDPD2
					GEMIN5
					GGH
					GLCE
					GLO1
					GLRX2
					GLUD2
					GNA11
					GNAQ
					GNMT
					GNPTAB
					GOLGA4
					GPIAP1
					GPR83
					GSPT1
					GSTA2
					GSTA3
					GSTA4
					GSTT2
					GYG1
					H3F3B
					HBP1
					HIF1A
					HIGD1A
					HIST1H2AL
					HIST1H3A
					HIST1H3C
					HIST1H3G
					HIST2H4B
					HMGB1
					HMGCS1
					HMGN1
					HNRPA2B1
					HNRPAB
					HNRPR
					HOXB8
					HSDL1
					HSP90AA1
					HSP90B1
					HSPA8
					HSPC159
					HUWE1
					IFT57
					IFT81
					IGF2R
					IGL@
					IGSF4D
					IL9
					INE1
					INTS2
					IPP
					IQCA
					IRS1
					ITGB1
					ITLN1
					ITM2B
					KAL1
					KARS
					KAT3
					KCTD20
					KCTD8
					KIAA0738
					KL
					KLHL2
					KLK11
					KLK6
					KRT13
					KRT15
					KRT2
					KRT26
					LARP1
					LDLR
					LGMN
					LIMA1
					LOC124220
					LOC144983
					LOC153222
					LOC202459
					LOC388335
					LOC399761
					LOC441294
					LOC552891
					LOC81691
					LONRF1
					LRP12
					LRRC39
					MAD2L1
					MAFB
					MAPK9
					MAPKAP1
					MARS2
					MARVELD3
					MATR3
					MCM3APAS
					MED6
					MEIS1
					MESP1
					METTL7A
					MGST1
					MOAP1
					MOCS2
					MON1B
					MORF4L1
					MRFAP1L1
					MRPL1
					MRPL3
					MT1X
					MTMR9
					MTRF1L
					MYEOV2
					MYLIP
					MYST3
					NADK
					NAGK
					NANS
					NARG1L
					NAT13
					NCKAP1
					NDUFS2
					NEU1
					NHN1
					NIPA1
					NONO
					NOV
					NPTN
					NR0B1
					NR3C1
					NRXN3
					NT5C2
					NUDT4
					NUPL2
					OCIAD1
					OSBP
					PAIP2
					PARL
					PB1
					PCBP2
					PCDH7
					PCMT1
					PCTK2
					PDCD7
					PDE6D
					PGM3
					PHF5A
					PI4K2B
					PICALM
					PIK3CB
					PLCXD3
					PLP1
					PLS3
					PNRC2
					PODN
					POF1B
					POFUT2
					POL
					PPIL4
					PPM1K
					PPP1CA
					PPP1CB
					PPP2CB
					PPP2R5C
					PQLC3
					PRDX1
					PRDX3
					PRKAG1
					PRO0457
					PRO0483
					PRPS2
					PSAT1
					PSMB2
					PSMD10
					PSMD11
					PTMA
					PTP4A2
					PTPN11
					PTPN9
					RAB18
					RAB1A
					RAB28
					RAB31
					RAC1
					RALB
					RANBP9
					RAP1A
					RASAL2
					RBM7
					RBMX2
					RCBTB1
					RCN2
					RDH11
					RDX
					REV3L
					RGPD5
					RGS5
					RGS7
					RIOK3
					RLN2
					RNF17
					RPIB9
					RRAGC
					RYBP
					S100A10
					S100B
					SAPS3
					SAR1B
					SBDS
					SCARB2
					SCEL
					SCGB1D1
					SCGB1D2
					SCNN1A
					SCOC
					SDHD
					SEC24D
					SELT
					SEPHS2
					SEPP1
					SERP1
					SERPINB13
					SERPINI1
					SERTAD4
					SESN1
					SFRS14
					SFRS15
					SFRS2
					SFRS2B
					SFRS5
					SH3BGRL
					SLC22A10
					SLC25A16
					SLC2A12
					SLC2A5
					SLC33A1
					SLC35A1
					SLC39A1
					SMARCA2
					SMN2
					SMPD1
					SNAP25
					SNCA
					SNRPN
					SNTB2
					SNX17
					SNX25
					SNX3
					SOX2
					SPAG1
					SPAG7
					SPATA2
					SRI
					SRP72
					SRP9
					SS18
					STARD3NL
					STAT1
					STEAP1
					STOX2
					SUMO2
					SYAP1
					SYBL1
					SYF2
					SYNE2
					SYT17
					TAF11
					TAX1BP1
					TBC1D9
					TBRG1
					TCEAL1
					TCF4
					THC2242233
					THC2308781
					THC2339568
					THRAP1
					TMBIM1
					TMEM135
					TMEM79
					TNFSF5IP1
					TNPO3
					TOMM70A
					TRAF3IP2
					TRAM1
					TRIM2
					TRNT1
					TSC22D2
					TSHZ1
					TSP50
					TSPAN8
					TTC1
					TTTY11
					TUFM
					TXNDC12
					UPF3B
					UPK3A
					USP13
					VBP1
					VPS29
					WRB
					XAGE3
					XKR6
					XPOT
					XRCC6
					YWHAQ
					YWHAZ
					YY1
					ZBED2
					ZCCHC17
					ZFAND6
					ZFP36L2
					ZHX1
					ZNF117
					ZNF137
					ZNF180
					ZNF181
					ZNF185
					ZNF397
					ZNF429
					ZNF43
					ZNF430
					ZNF486
					ZNF492
					ZNF493
					ZNF503
					ZNF573
					ZNF578
					ZNF588
					ZNF624
					ZNF652
					ZNF654
					ZNF675
					ZNF678
					ZNF714
					ZNF85
